# Supplementary material
Source: publisher figshare collection journal article supplement (https://tandf.figshare.com/ndownloader/files/17920850)
Supplement: Supplementary file 1 [file 17920850]

Archive with 1 entries (1 files):
- 17920850.out
